# Supplementary material
Source: Springer Nature journal article supplement (https://www.springermedizin.de/resource/supplementary/12913_2012_2643_MOESM5_ESM.pdf/9531042)
Supplement: MOESM5 [file 9531042]

# CONFIDENCE SCALE

0 ----- 5 ----- 10

NOT AT ALL  
CONFIDENT

SOMEWHAT  
CONFIDENT

TOTALLY  
CONFIDENT

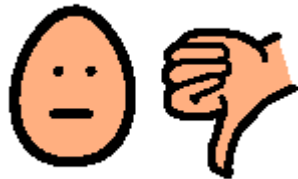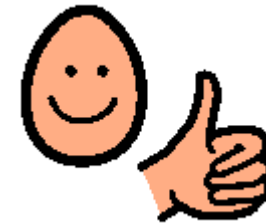

*Question: How confident are you that you can.....*
